# Supplementary material for: Whole-Genome Sequencing for Tracing the Genetic Diversity of Brucella abortus and Brucella melitensis Isolated from Livestock in Egypt
Source: MDPI journal article supplement (doi:10.3390/pathogens10060759), 2021-06-16
Supplement: s1 [file s1]

**Table S2a.** *B. abortus* isolates recovered from livestock examined by MLVA-16 analysis. Panel 1 includes 8 minisatellite markers and panel 2 (2A and 2B) another eight microsatellites.

| ID        | Strains                 | MLVA type |         |         |         |         |         |         |         |          |         |         |          |         |         |         |         | MLVA type |
|-----------|-------------------------|-----------|---------|---------|---------|---------|---------|---------|---------|----------|---------|---------|----------|---------|---------|---------|---------|-----------|
|           |                         | Panel 1   |         |         |         |         |         |         |         | Panel 2A |         |         | Panel 2B |         |         |         |         |           |
|           |                         | Bruce06   | Bruce08 | Bruce11 | Bruce12 | Bruce42 | Bruce43 | Bruce45 | Bruce55 | Bruce18  | Bruce19 | Bruce21 | Bruce04  | Bruce07 | Bruce09 | Bruce16 | Bruce30 |           |
| 18RB17233 | <i>B. abortus</i>       | 4         | 5       | 4       | 12      | 2       | 2       | 3       | 3       | 6        | 43      | 8       | 4        | 4       | 3       | 4       | 4       |           |
| 18RB17242 | <i>B. abortus</i>       | 4         | 5       | 4       | 12      | 2       | 2       | 3       | 3       | 6        | 43      | 8       | 4        | 4       | 3       | 4       | 4       |           |
| 18RB17243 | <i>B. abortus</i>       | 4         | 5       | 4       | 12      | 2       | 2       | 3       | 3       | 6        | 43      | 8       | 4        | 4       | 3       | 4       | 4       |           |
| 18RB17245 | <i>B. abortus</i>       | 4         | 5       | 4       | 12      | 2       | 2       | 3       | 3       | 6        | 43      | 8       | 4        | 4       | 3       | 4       | 4       |           |
| 18RB17255 | <i>B. abortus</i>       | 4         | 5       | 4       | 12      | 2       | 2       | 3       | 3       | 6        | 43      | 8       | 4        | 4       | 3       | 4       | 4       |           |
| 18RB17256 | <i>B. abortus</i>       | 4         | 5       | 4       | 12      | 2       | 2       | 3       | 3       | 6        | 43      | 8       | 4        | 4       | 3       | 5       | 4       |           |
| 18RB17257 | <i>B. abortus</i>       | 4         | 5       | 4       | 12      | 2       | 2       | 3       | 3       | 6        | 43      | 8       | 4        | 4       | 3       | 4       | 4       |           |
| 18RB17259 | <i>B. abortus</i>       | 4         | 5       | 4       | 12      | 2       | 2       | 3       | 3       | 6        | 43      | 8       | 4        | 4       | 3       | 5       | 4       |           |
| Reference | <i>B. abortus</i> -2308 | 4         | 5       | 4       | 12      | 2       | 3       | 3       | 3       | 6        | 43      | 8       | 3        | 7       | 3       | 3       | 5       |           |

Table S2b. *B. melitensis* isolates recovered from livestock examined by MLVA-16 analysis. Panel 1 includes 8 minisatellite markers and panel 2 (2A and 2B) another eight microsatellites.

| ID        | Strains                  | MLVA type |         |         |         |         |         |         |         |          |         |         |          |         |         |         |         | MLVA type |
|-----------|--------------------------|-----------|---------|---------|---------|---------|---------|---------|---------|----------|---------|---------|----------|---------|---------|---------|---------|-----------|
|           |                          | Panel 1   |         |         |         |         |         |         |         | Panel 2A |         |         | Panel 2B |         |         |         |         |           |
|           |                          | Bruce06   | Bruce08 | Bruce11 | Bruce12 | Bruce42 | Bruce43 | Bruce45 | Bruce55 | Bruce18  | Bruce19 | Bruce21 | Bruce04  | Bruce07 | Bruce09 | Bruce16 | Bruce30 |           |
| 18RB17227 | <i>B. melitensis</i>     | 3         | 5       | 3       | 13      | 1       | 1       | 3       | 3       | 7        | 43      | 8       | 5        | 7       | 9       | 11      | 3       |           |
| 18RB17228 | <i>B. melitensis</i>     | 3         | 5       | 3       | 13      | 1       | 1       | 3       | 3       | 7        | 43      | 8       | 5        | NA      | 9       | 11      | 3       |           |
| 18RB17229 | <i>B. melitensis</i>     | 3         | 5       | 3       | 13      | 1       | 1       | 3       | 3       | 7        | 43      | 8       | 5        | NA      | 9       | 11      | 3       |           |
| 18RB17230 | <i>B. melitensis</i>     | 3         | 5       | 3       | 13      | 1       | 1       | 3       | 3       | 7        | 43      | 8       | 5        | 7       | 9       | 11      | 3       |           |
| 18RB17235 | <i>B. melitensis</i>     | 3         | 5       | 3       | 13      | 1       | 1       | 3       | 3       | 7        | 43      | 8       | 5        | NA      | 9       | 11      | 3       |           |
| 18RB17236 | <i>B. melitensis</i>     | 3         | 5       | 3       | 13      | 1       | 1       | 3       | 3       | 7        | 43      | 8       | 5        | NA      | 9       | 11      | 3       |           |
| 18RB17238 | <i>B. melitensis</i>     | 3         | 5       | 3       | 13      | 1       | 1       | 3       | 3       | 7        | 43      | 8       | 5        | NA      | 9       | 11      | 3       |           |
| 18RB17240 | <i>B. melitensis</i>     | 3         | 5       | 3       | 13      | 1       | 1       | 3       | 3       | 7        | 43      | 8       | 5        | NA      | 9       | 11      | 3       |           |
| 18RB17241 | <i>B. melitensis</i>     | 3         | 5       | 3       | 13      | 1       | 1       | 3       | 3       | 7        | 43      | 8       | 5        | 7       | 9       | 11      | 3       |           |
| 18RB17242 | <i>B. melitensis</i>     | 3         | 5       | 3       | 13      | 1       | 1       | 3       | 3       | 8        | 43      | 8       | 7        | 5       | 7       | 4       | 3       |           |
| 18RB17243 | <i>B. melitensis</i>     | 3         | 5       | 3       | 13      | 1       | 1       | 3       | 3       | 8        | 43      | 8       | 7        | 5       | 7       | 4       | 3       |           |
| 18RB17247 | <i>B. melitensis</i>     | 3         | 5       | 3       | 13      | 1       | 1       | 3       | 3       | 8        | 43      | 8       | 7        | 5       | 9       | 5       | 3       |           |
| 18RB17248 | <i>B. melitensis</i>     | 3         | 5       | 3       | 13      | 1       | 1       | 3       | 3       | 8        | 43      | 8       | 6        | 5       | 10      | 5       | 3       |           |
| 18RB17249 | <i>B. melitensis</i>     | 3         | 5       | 3       | 13      | 1       | 1       | 3       | 3       | 8        | 43      | 8       | 6        | 5       | 9       | 5       | 3       |           |
| 18RB17250 | <i>B. melitensis</i>     | 3         | 5       | 3       | 13      | 1       | 1       | 3       | 3       | 8        | 43      | 8       | 6        | 5       | 9       | 5       | 3       |           |
| 18RB17251 | <i>B. melitensis</i>     | 3         | 5       | 3       | 13      | 1       | 1       | 3       | 3       | 8        | 43      | NA      | 6        | 5       | 7       | 6       | 3       |           |
| 18RB17252 | <i>B. melitensis</i>     | 3         | 5       | 3       | 13      | 1       | 1       | 3       | 3       | 7        | 43      | 8       | 5        | 5       | 6       | 8       | 3       |           |
| 18RB17253 | <i>B. melitensis</i>     | 3         | 5       | 3       | 13      | 1       | 1       | 3       | 3       | 7        | 43      | 8       | 5        | 5       | 6       | 8       | 3       |           |
| 18RB17254 | <i>B. melitensis</i>     | 3         | 5       | 3       | 13      | 1       | 1       | 3       | 3       | 7        | 43      | 8       | 5        | 5       | 6       | 8       | 3       |           |
| 18RB17258 | <i>B. melitensis</i>     | 3         | 5       | 3       | 13      | 1       | 1       | 3       | 3       | 7        | 43      | 8       | 5        | 5       | 10      | 7       | 3       |           |
| 18RB17260 | <i>B. melitensis</i>     | 3         | 5       | 3       | 13      | 1       | 1       | 3       | 3       | 7        | 48      | NA      | 9        | NA      | 8       | 9       | 3       |           |
| Reference | <i>B. melitensis</i> 16M | 3         | 4       | 2       | 13      | 4       | 2       | 3       | 3       | 5        | 36      | 6       | 2        | 5       | 7       | 3       | 6       |           |
