# Supplementary material for: Whole-Genome Sequencing for Tracing the Genetic Diversity of Brucella abortus and Brucella melitensis Isolated from Livestock in Egypt
Source: MDPI journal article supplement (doi:10.3390/pathogens10060759), 2021-06-16
Supplement: s1 [file s1]

**Table S4.** SNP variant types for chromosome 1 (NZ\_CP007681) and chromosome 2 (NZ\_CP007680) of reference *B. abortus* BDW, and chromosomes 1 (NC\_003317) and 2 (NC\_003318) of reference *B. melitensis* 16M

| SNP type                | <i>B. abortus</i> |        |             |        | <i>B. melitensis</i> |        |           |        |
|-------------------------|-------------------|--------|-------------|--------|----------------------|--------|-----------|--------|
|                         | NZ_CP007681       |        | NZ_CP007680 |        | NC_003317            |        | NC_003318 |        |
| Missense variant        | 62                | 43.66% | 60          | 52.63% | 881                  | 47.06% | 534       | 48.06% |
| Splice region variant   | 0                 | 0%     | 0           | 0%     | 3                    | 0.16%  | 0         | 0      |
| Start lost              | 0                 | 0%     | 0           | 0%     | 1                    | 0.05%  | 0         | 0      |
| Stop gained             | 0                 | 0%     | 2           | 1.75%  | 9                    | 0.48%  | 5         | 0.45%  |
| Stop lost               | 1                 | 0.70%  | 0           | 0%     | 2                    | 0.11%  | 0         | 0      |
| Synonymous variant      | 43                | 30.28% | 28          | 24.56% | 548                  | 29.27% | 303       | 27.27% |
| Upstream gene           | 36                | 25.35% | 24          | 21.05% | 428                  | 22.86% | 260       | 23.40% |
| Downstream gene         | 0                 | 0%     | 0           | 0%     | 0                    | 0.00%  | 8         | 0.72%  |
| Initiator codon variant | 0                 | 0%     | 0           | 0%     | 0                    | 0.00%  | 1         | 0.09%  |
| Total                   | 142               |        | 144         |        | 1872                 |        | 1111      |        |

\* Percentage of SNP type in relation to the total cgSNPs
